# Supplementary material
Source: ML conference proceedings conference paper supplement (https://openaccess.thecvf.com/content/CVPR2022/html/Wang_Aesthetic_Text_Logo_CVPR_2022_paper.html)
Supplement: Supplementary file 1 [file Wang_Aesthetic_Text_Logo_CVPR_2022_supplemental.zip]

Archive with 1 entries (1 files):
- 03621-supp.pdf
